# Supplementary material for: Evaluation of Anti-Neuroinflammatory Activity of Isatin Derivatives in Activated Microglia
Source: MDPI journal article supplement (doi:10.3390/molecules28124882), 2023-06-20

## Supplementary Materials

### Evaluation of Anti-Neuroinflammatory Activity of Synthetic Isatin Derivatives in Activated Microglia

Alejandro Cenalmor,<sup>1</sup> Elena Pascual,<sup>1</sup> Sergio Gil-Manso,<sup>2</sup> Rafael Correa-Rocha,<sup>2</sup> José Ramón Suárez<sup>3</sup> and Isabel García-Álvarez\*<sup>1</sup>

<sup>1</sup>*Facultad de Ciencias Experimentales, Universidad Francisco de Vitoria, 28223 Pozuelo de Alarcón, Madrid, Spain.*

<sup>2</sup>*Laboratory of Immune-Regulation, Gregorio Marañón Health Research Institute (IISGM), 28009 Madrid, Spain.*

<sup>3</sup>*Departamento de Química en Ciencias Farmacéuticas, Facultad de Farmacia, Universidad Complutense de Madrid 28040 Madrid, Spain.*

\*Corresponding Author For Isabel García-Álvarez, e-mail: [isabel.alvarez@ufv.es](mailto:isabel.alvarez@ufv.es)

#### Table of Contents:

|                                                                                                                                      | Page |
|--------------------------------------------------------------------------------------------------------------------------------------|------|
| Table S1. Cell viability and LPS induced NO release in BV2 cells treated with compounds at concentrations 5, 25 and 50 $\mu$ M ..... | 3    |
| Table S2. IL-6 and TNF- $\alpha$ release by LPS activated BV2 cells treated with non cytotoxic isatin derivatives .....              | 4    |
| Figure S1. <sup>1</sup> H-NMR spectrum of compound <b>10</b> .....                                                                   | 5    |
| Figure S2. <sup>1</sup> H-NMR spectrum of compound <b>1</b> .....                                                                    | 6    |
| Figure S3. <sup>1</sup> H-NMR spectrum of compound <b>12</b> .....                                                                   | 7    |
| Figure S4. <sup>1</sup> H- and <sup>13</sup> C-NMR spectra of compound <b>13</b> .....                                               | 8    |
| Figure S5. <sup>1</sup> H- and <sup>13</sup> C-NMR spectra of compound <b>14</b> .....                                               | 9    |
| Figure S6. <sup>1</sup> H- and <sup>13</sup> C-NMR spectra of compound <b>15</b> .....                                               | 10   |
| Figure S7. <sup>1</sup> H-NMR spectrum of compound <b>16</b> .....                                                                   | 11   |
| Figure S8. <sup>1</sup> H- and <sup>13</sup> C-NMR spectra of compound <b>17</b> .....                                               | 12   |
| Figure S9. <sup>1</sup> H- and <sup>13</sup> C-NMR spectra of compound <b>18</b> .....                                               | 13   |
| Figure S10. <sup>1</sup> H-NMR spectrum of compound <b>19</b> .....                                                                  | 14   |

|                                                                                         |    |
|-----------------------------------------------------------------------------------------|----|
| Figure S11. $^1\text{H}$ - and $^{13}\text{C}$ -NMR spectra of compound <b>20</b> ..... | 15 |
| Figure S12. $^1\text{H}$ - and $^{13}\text{C}$ -NMR spectra of compound <b>21</b> ..... | 16 |
| Figure S13. $^1\text{H}$ - and $^{13}\text{C}$ -NMR spectra of compound <b>22</b> ..... | 17 |
| Figure S14. $^1\text{H}$ -NMR spectrum of compound <b>23</b> .....                      | 18 |

**Table S1.** Cell viability and LPS induced NO release in BV2 cells treated with compounds at concentrations of 5, 25 and 50  $\mu\text{M}$ .<sup>a</sup>

| Cell viability (%) |                 |                  |                  | [nitrite] <sup>b</sup> ( $\mu\text{M}$ ) |                      |                      |
|--------------------|-----------------|------------------|------------------|------------------------------------------|----------------------|----------------------|
| Compd.             | 5 $\mu\text{M}$ | 25 $\mu\text{M}$ | 50 $\mu\text{M}$ | 5 $\mu\text{M}$                          | 25 $\mu\text{M}$     | 50 $\mu\text{M}$     |
| <b>1</b>           | 105 $\pm$ 1     | 106 $\pm$ 2      | 103 $\pm$ 3      | 4.19 $\pm$ 0.40                          | 5.61 $\pm$ 0.40      | 5.11 $\pm$ 0.40      |
| <b>2</b>           | 109 $\pm$ 4     | 107 $\pm$ 3      | 110 $\pm$ 4      | 5.28 $\pm$ 0.23                          | 4.25 $\pm$ 0.20      | 4.53 $\pm$ 0.20      |
| <b>3</b>           | 105 $\pm$ 3     | 90 $\pm$ 3       | 50 $\pm$ 3****   | 3.52 $\pm$ 0.15                          | 2.33 $\pm$ 0.30***   | N.D. <sup>c</sup>    |
| <b>4</b>           | 107 $\pm$ 7     | 68 $\pm$ 3***    | 39 $\pm$ 1***    | 4.05 $\pm$ 0.37                          | 2.71 $\pm$ 0.45**    | N.D.                 |
| <b>5</b>           | 100 $\pm$ 4     | 68 $\pm$ 3***    | 34 $\pm$ 3***    | 3.24 $\pm$ 0.12*                         | 2.64 $\pm$ 0.04**    | N.D.                 |
| <b>6</b>           | 101 $\pm$ 7     | 55 $\pm$ 2***    | 28 $\pm$ 2****   | 3.16 $\pm$ 0.18*                         | 2.52 $\pm$ 0.10**    | N.D.                 |
| <b>7</b>           | 118 $\pm$ 5     | 115 $\pm$ 4      | 93 $\pm$ 5       | 4.80 $\pm$ 0.17                          | 2.92 $\pm$ 0.22**    | 3.04 $\pm$ 0.11*     |
| <b>8</b>           | 114 $\pm$ 3     | 120 $\pm$ 4      | 99 $\pm$ 4       | 3.71 $\pm$ 1.45                          | 3.52 $\pm$ 0.25      | 3.03 $\pm$ 0.18      |
| <b>9</b>           | 105 $\pm$ 5     | 115 $\pm$ 3      | 120 $\pm$ 3      | 4.13 $\pm$ 0.98                          | 4.36 $\pm$ 0.33      | 3.71 $\pm$ 0.40      |
| <b>10</b>          | 102 $\pm$ 2     | 97 $\pm$ 2       | 80 $\pm$ 3       | 2.27 $\pm$ 0.17**                        | 1.70 $\pm$ 0.15***** | 1.60 $\pm$ 0.14***** |
| <b>11</b>          | 100 $\pm$ 2     | 100 $\pm$ 3      | 90 $\pm$ 2       | 5.49 $\pm$ 0.52                          | 4.24 $\pm$ 0.60      | 3.00 $\pm$ 0.43****  |
| <b>12</b>          | 90 $\pm$ 3      | 92 $\pm$ 4       | 84 $\pm$ 3       | 4.11 $\pm$ 0.12                          | 2.60 $\pm$ 0.12**    | 1.60 $\pm$ 0.05***** |
| <b>13</b>          | 105 $\pm$ 2     | 110 $\pm$ 2      | 114 $\pm$ 2      | 3.91 $\pm$ 0.13                          | 3.30 $\pm$ 0.20      | 2.50 $\pm$ 0.21*     |
| <b>14</b>          | 108 $\pm$ 2     | 92 $\pm$ 1       | 85 $\pm$ 3       | 4.43 $\pm$ 0.30                          | 4.71 $\pm$ 0.24      | 4.05 $\pm$ 0.34      |
| <b>15</b>          | 106 $\pm$ 1     | 100 $\pm$ 2      | 102 $\pm$ 1      | 4.00 $\pm$ 0.20                          | 3.65 $\pm$ 0.13      | 3.31 $\pm$ 0.13      |
| <b>16</b>          | 97 $\pm$ 2      | 85 $\pm$ 3*      | 80 $\pm$ 2*      | 6.72 $\pm$ 0.81                          | 7.00 $\pm$ 1.00      | 5.84 $\pm$ 0.43      |
| <b>17</b>          | 100 $\pm$ 2     | 67 $\pm$ 1***    | 24 $\pm$ 3****   | 2.65 $\pm$ 0.30***                       | 1.16 $\pm$ 0.12***** | N.D.                 |
| <b>18</b>          | 100 $\pm$ 3     | 82 $\pm$ 3**     | 21 $\pm$ 2****   | 3.60 $\pm$ 0.30                          | 1.53 $\pm$ 0.30***** | N.D.                 |
| <b>19</b>          | 100 $\pm$ 2     | 85 $\pm$ 2*      | 65 $\pm$ 2***    | 3.90 $\pm$ 0.23                          | 1.60 $\pm$ 0.07***** | N.D.                 |
| <b>20</b>          | 100 $\pm$ 1     | 106 $\pm$ 2      | 93 $\pm$ 2       | 2.74 $\pm$ 0.12***                       | 1.45 $\pm$ 0.12***** | 1.20 $\pm$ 0.20***** |
| <b>21</b>          | 113 $\pm$ 4     | 110 $\pm$ 3      | 100 $\pm$ 2      | 4.72 $\pm$ 0.21                          | 4.41 $\pm$ 0.30      | 4.73 $\pm$ 0.53*     |
| <b>22</b>          | 100 $\pm$ 2     | 106 $\pm$ 3      | 85 $\pm$ 1       | 3.67 $\pm$ 0.30                          | 2.55 $\pm$ 0.30***   | 1.70 $\pm$ 0.15***   |
| <b>23</b>          | 95 $\pm$ 4      | 83 $\pm$ 3**     | 70 $\pm$ 3**     | 10.71 $\pm$ 0.74*                        | 11.10 $\pm$ 0.30*    | N.D.                 |

<sup>a</sup> Data are presented as the mean value  $\pm$  SEM of at least three independent experiments performed in triplicate. Cells were pretreated for 1 h with isatin derivatives (5, 25 or 50  $\mu\text{M}$ ) or vehicle (0.025% DMSO) followed by LPS stimulation (1  $\mu\text{g}/\text{mL}$ ) and incubation for 24 h at 37  $^{\circ}\text{C}$ . <sup>b</sup>NO production was determined by Griess test. <sup>c</sup>N.D. not determined due to low cell viability. LPS stimulated cells treated with vehicle viability was 100  $\pm$  3 % and [nitrite] = 4.52  $\pm$  0.12  $\mu\text{M}$ . \* $p$  < 0.05, \*\* $p$  < 0.01, \*\*\* $p$  < 0.001, \*\*\*\* $p$  < 0.0001 compared to LPS-stimulated cells treated with vehicle.

**Table S2.** IL-6 and TNF- $\alpha$  release by LPS-activated BV2 cells treated with non cytotoxic isatin derivatives.<sup>a</sup>

| Treatment compound   | [IL-6] (pg/mL) <sup>b</sup> | [TNF- $\alpha$ ] (pg/mL) <sup>b</sup> |
|----------------------|-----------------------------|---------------------------------------|
| Control <sup>c</sup> | 260 $\pm$ 28****            | 206 $\pm$ 22**                        |
| LPS                  | 2772 $\pm$ 521              | 728 $\pm$ 60                          |
| <b>1</b>             | 4504 $\pm$ 1591             | 514 $\pm$ 110                         |
| <b>3</b>             | 2197 $\pm$ 980              | 274 $\pm$ 63*                         |
| <b>10</b>            | 1146 $\pm$ 182*             | 394 $\pm$ 25*                         |
| <b>11</b>            | 3307 $\pm$ 1139             | 541 $\pm$ 162                         |
| <b>12</b>            | 2362 $\pm$ 872              | 580 $\pm$ 83                          |
| <b>13</b>            | 2333 $\pm$ 343              | 713 $\pm$ 123                         |
| <b>14</b>            | 4121 $\pm$ 939              | 887 $\pm$ 120                         |
| <b>15</b>            | 2406 $\pm$ 438              | 781 $\pm$ 62                          |
| <b>20</b>            | 1121 $\pm$ 374*             | 391 $\pm$ 34*                         |
| <b>21</b>            | 4148 $\pm$ 1040             | 946 $\pm$ 135                         |
| <b>22</b>            | 2018 $\pm$ 193              | 704 $\pm$ 21                          |

<sup>a</sup> Data are presented as the mean value  $\pm$  SEM of at least three independent experiments performed in triplicate. Cells were pretreated for 1 h with isatin derivatives (25  $\mu$ M) or vehicle (0.025% DMSO) followed by LPS stimulation (1  $\mu$ g/mL) and incubation for 24 h at 37 °C. IL-6 and TNF- $\alpha$  production were determined by microfluidic ELISA equipment ELLA. <sup>c</sup>Cells treated with vehicle without LPS-stimulation. \* $p$  < 0.05, \*\* $p$  < 0.01, \*\*\*\* $p$  < 0.0001 compared to LPS-stimulated cells treated with vehicle.

**$^1\text{H}$ - and  $^{13}\text{C}$ -NMR spectra:**

**Figure S1.**  $^1\text{H}$ -NMR (300 MHz,  $\text{CDCl}_3$ ) spectrum of compound **10**:

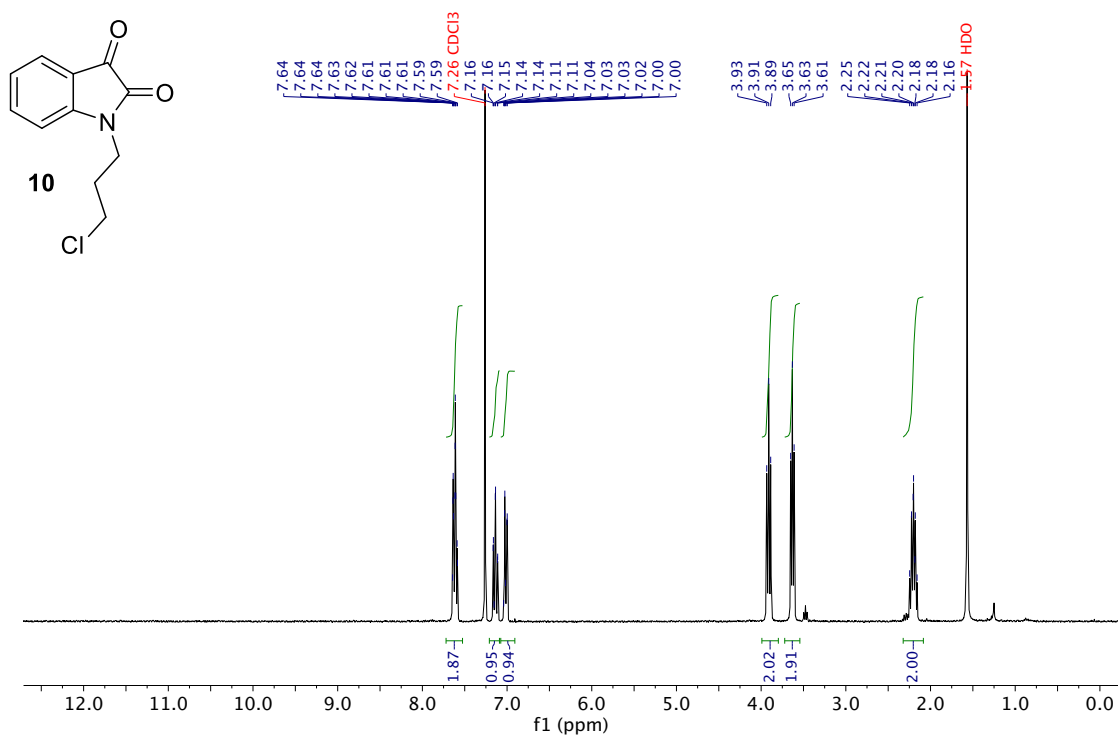

**Figure S2.**  $^1\text{H}$ -NMR (300 MHz,  $\text{CDCl}_3$ ) spectrum of compound **11**:

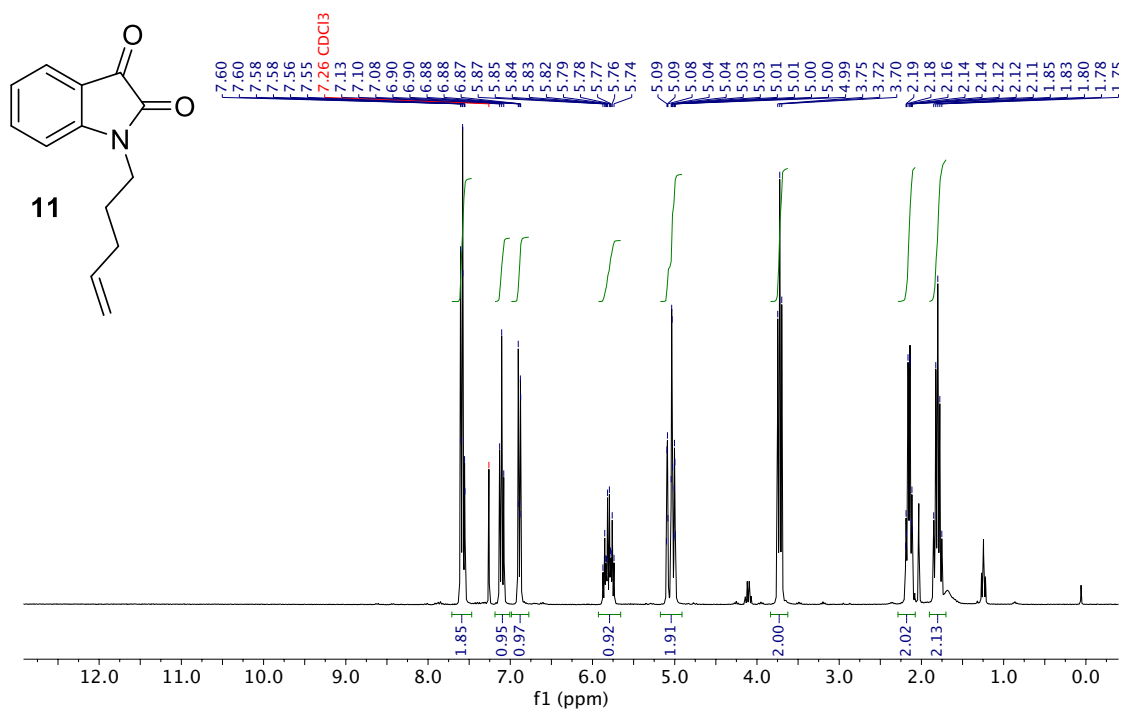

**Figure S3.**  $^1\text{H}$ -NMR (300 MHz,  $\text{CDCl}_3$ ) spectrum of compound **12**:

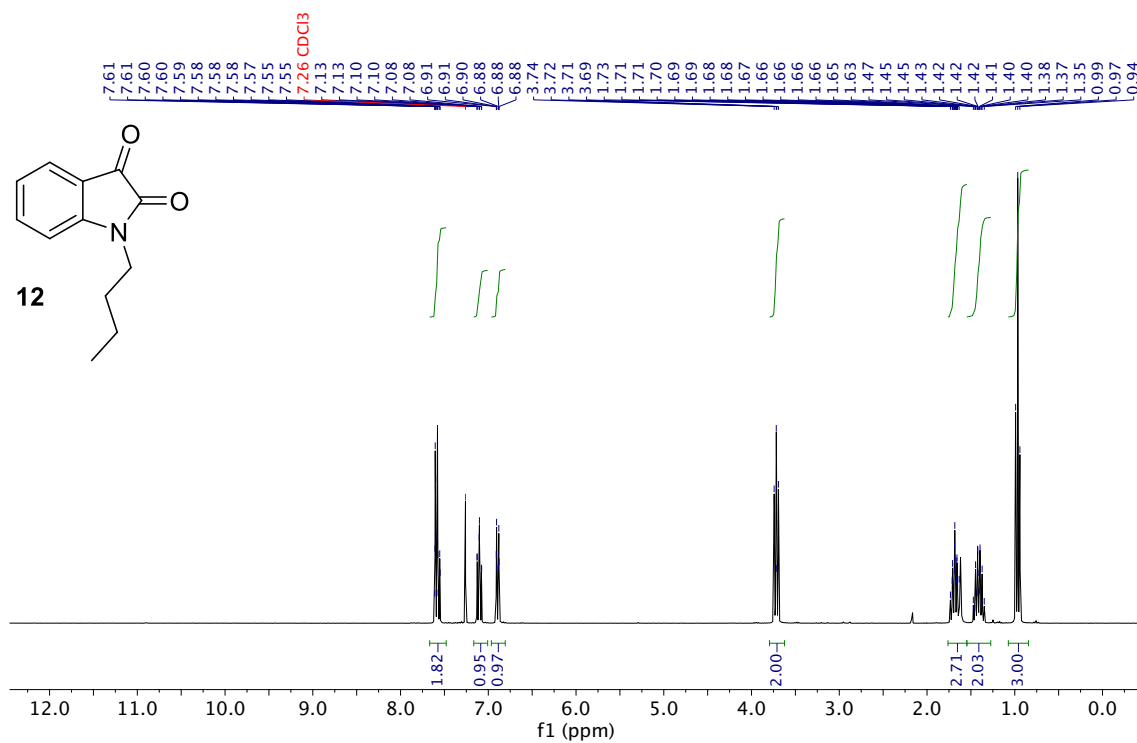

**Figure S4.**  $^1\text{H}$ - and  $^{13}\text{C}$ -NMR (300 and 75 MHz,  $\text{DMSO}-d_6$ ) spectra of compound **13**:

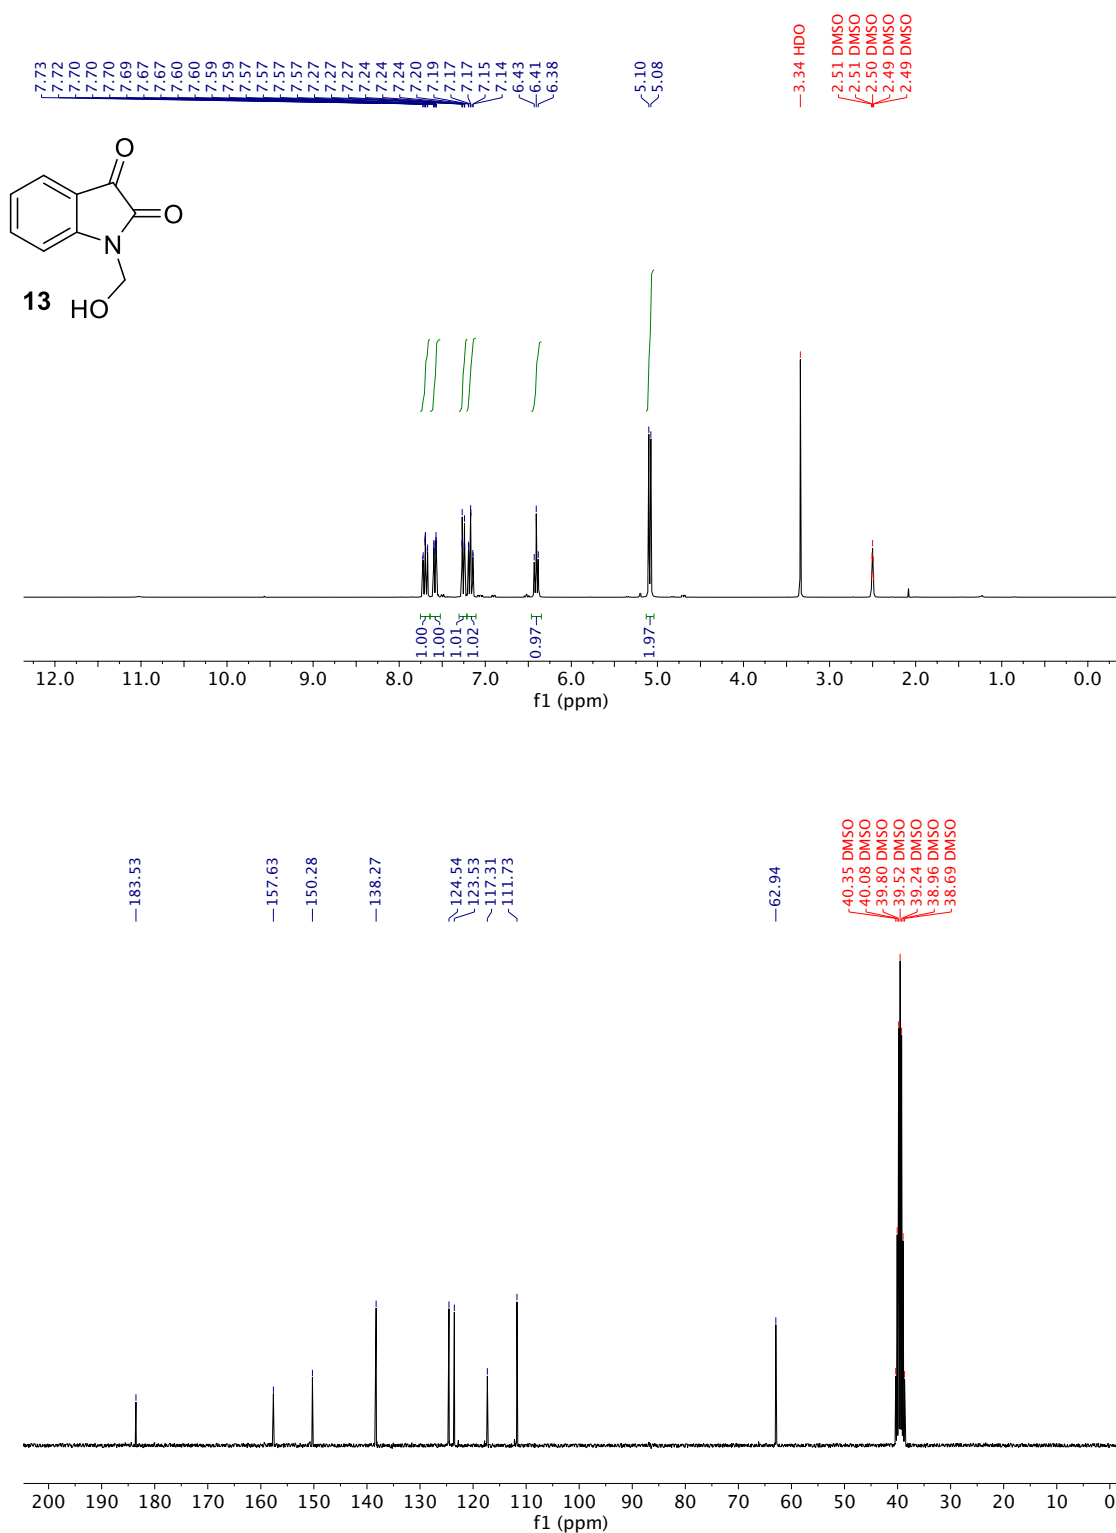



**Figure S5.**  $^1\text{H}$ - and  $^{13}\text{C}$ -NMR (300 and 75 MHz,  $\text{DMSO}-d_6$ ) spectra of compound **14**:

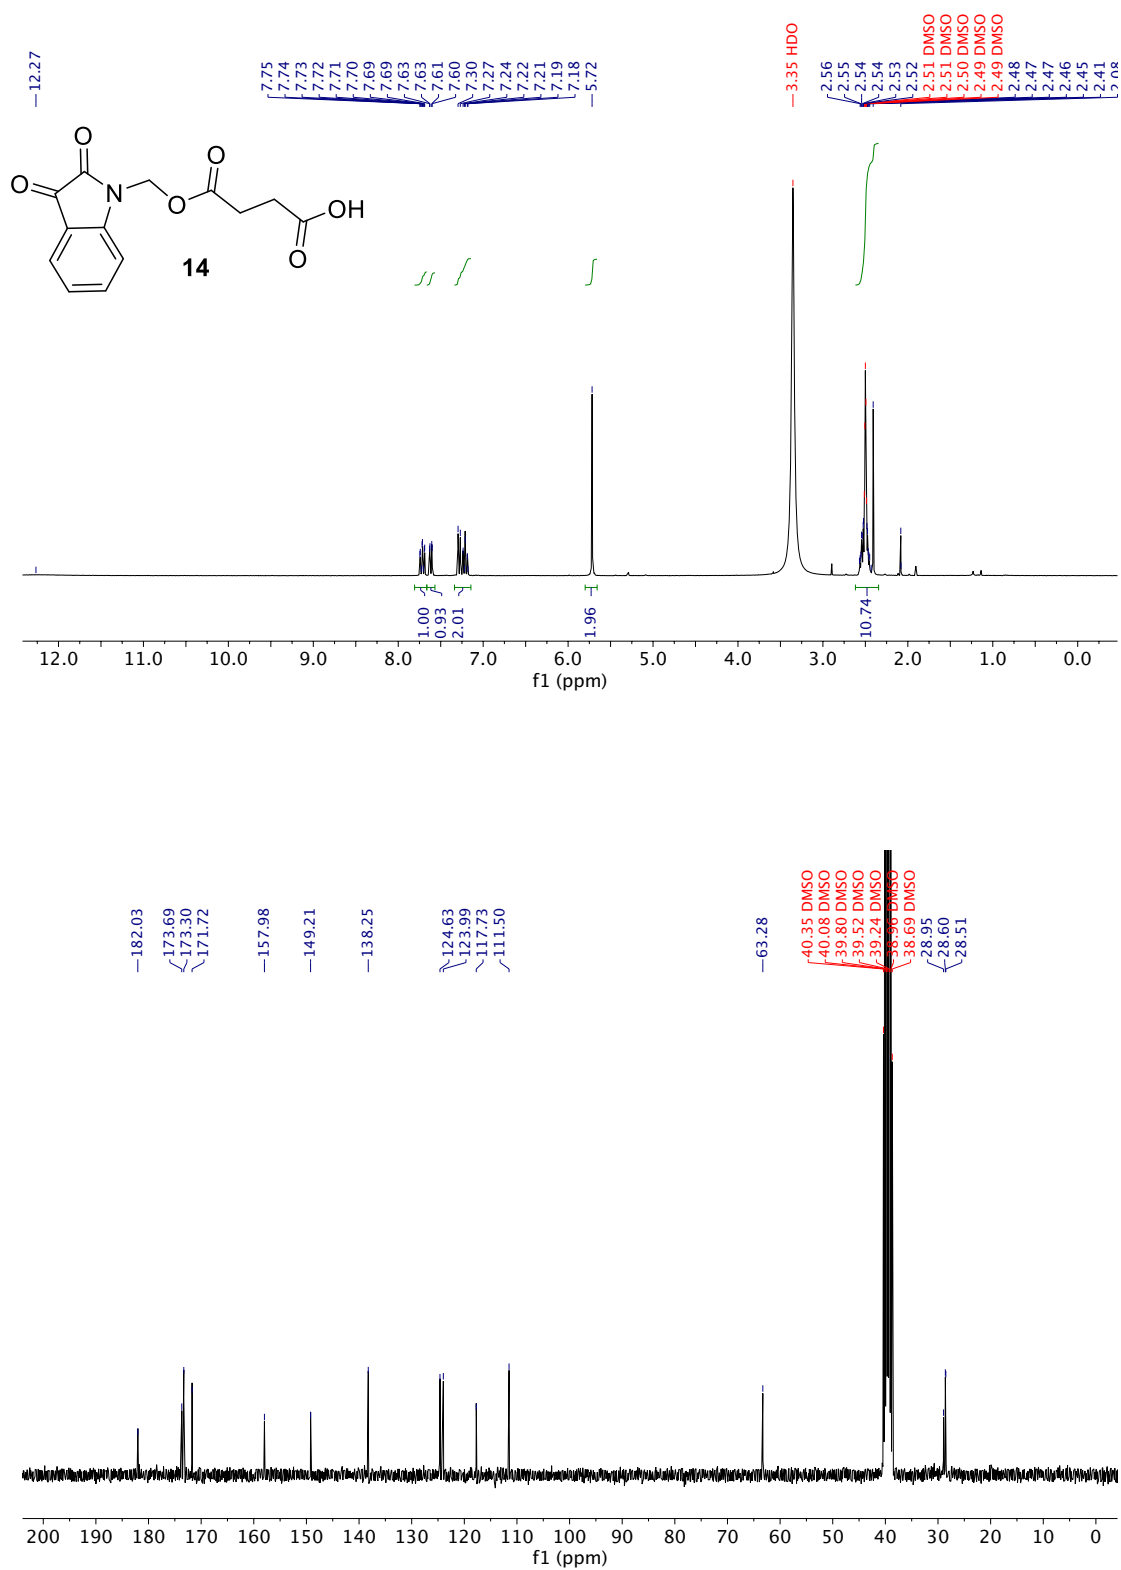

**Figure S6.**  $^1\text{H}$ - and  $^{13}\text{C}$ -NMR (300 and 75 MHz,  $\text{DMSO-}d_6$ ) spectra of compound **15**:

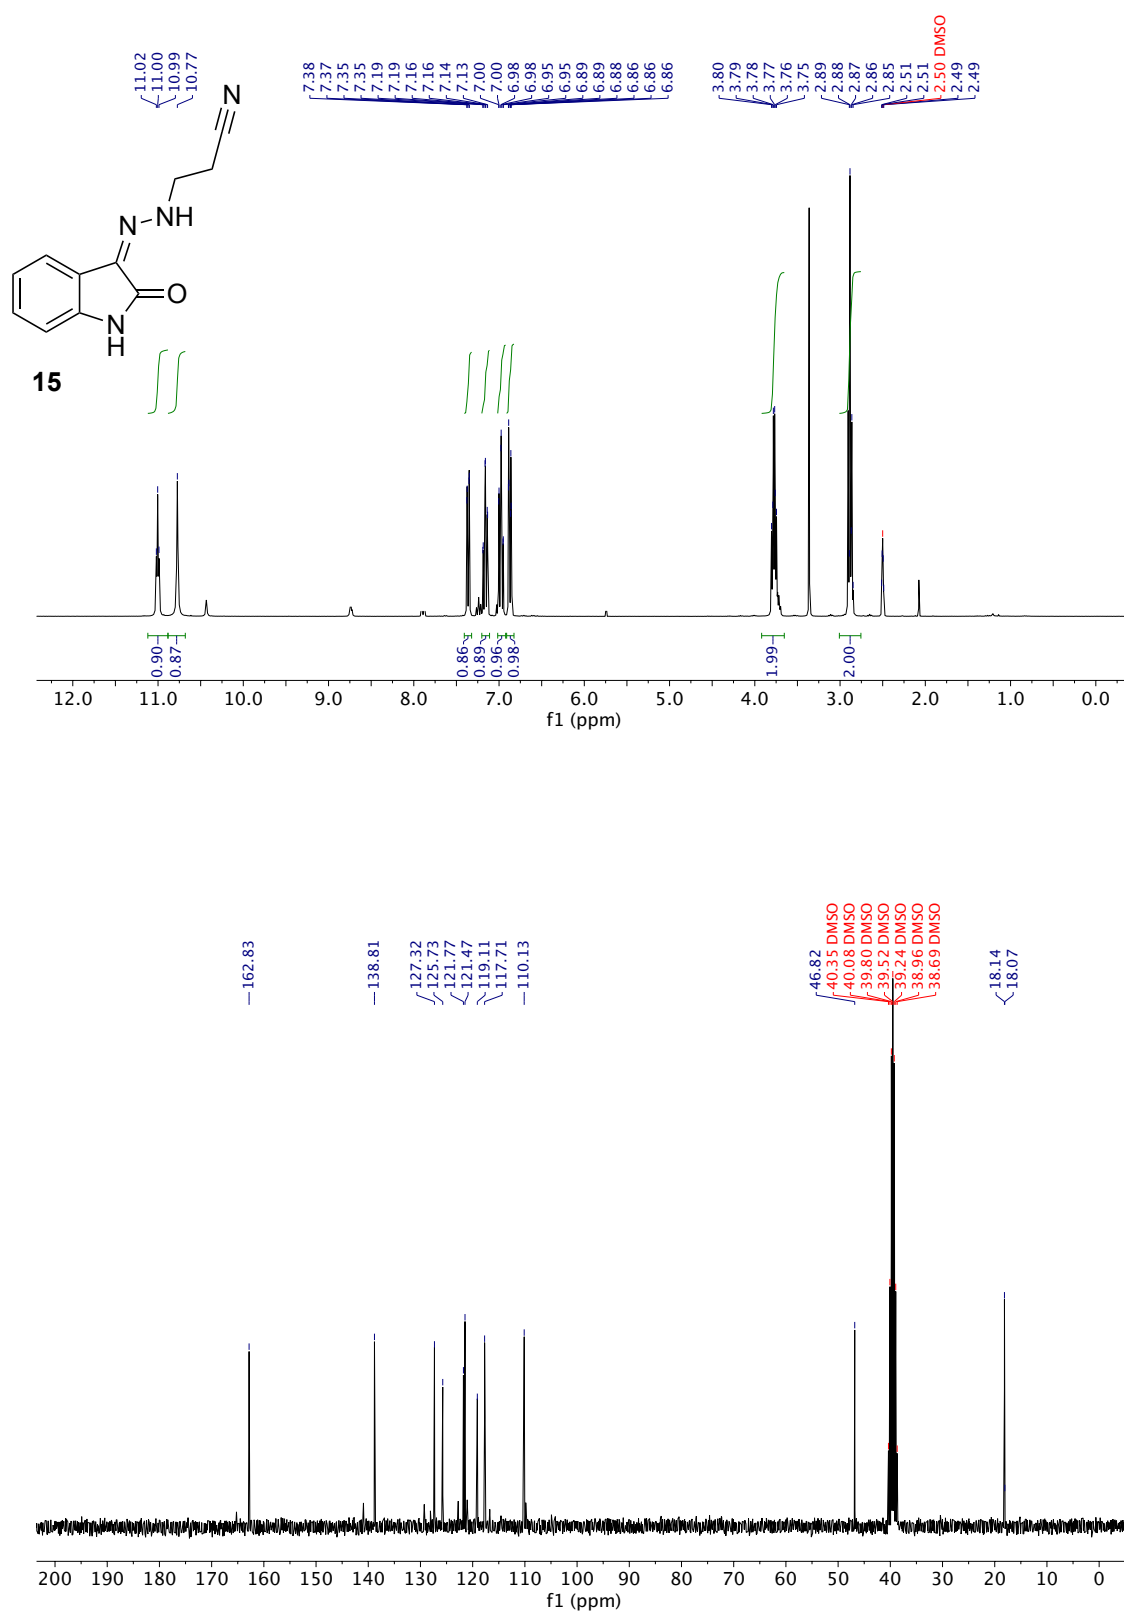

**Figure S7.**  $^1\text{H}$ -NMR (300 MHz,  $\text{DMSO}-d_6$ ) spectrum of compound **16**:

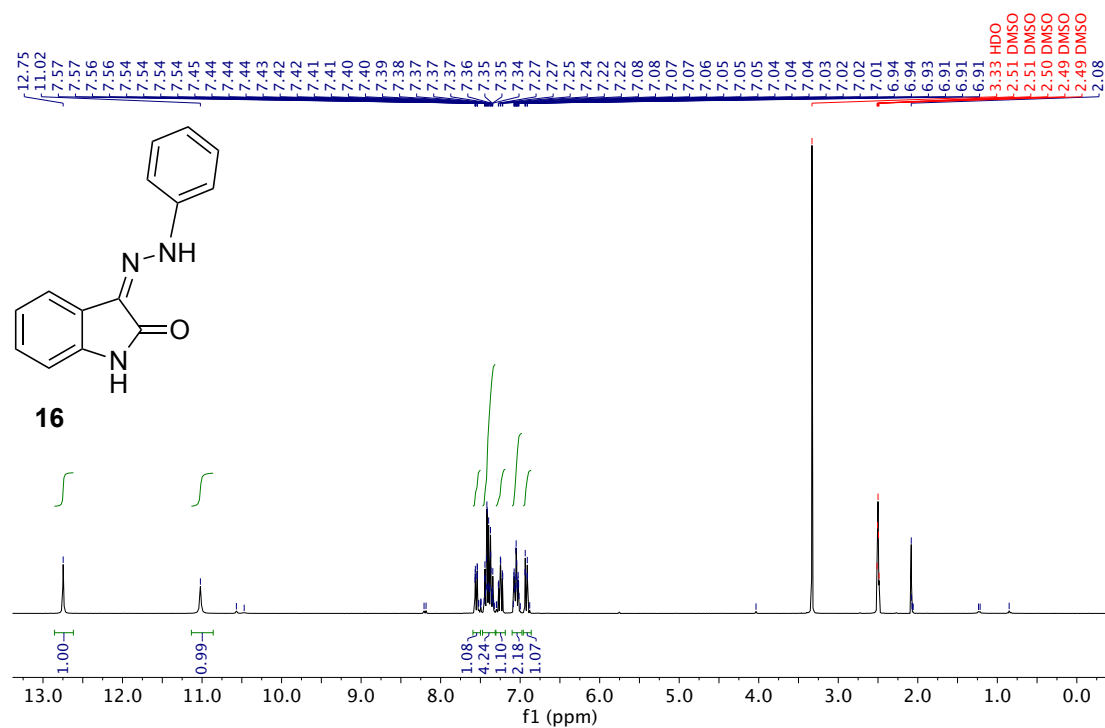

**Figure S8.**  $^1\text{H}$ - and  $^{13}\text{C}$ -NMR (300 and 75 MHz,  $\text{CDCl}_3$ ) spectra of compound **17**:

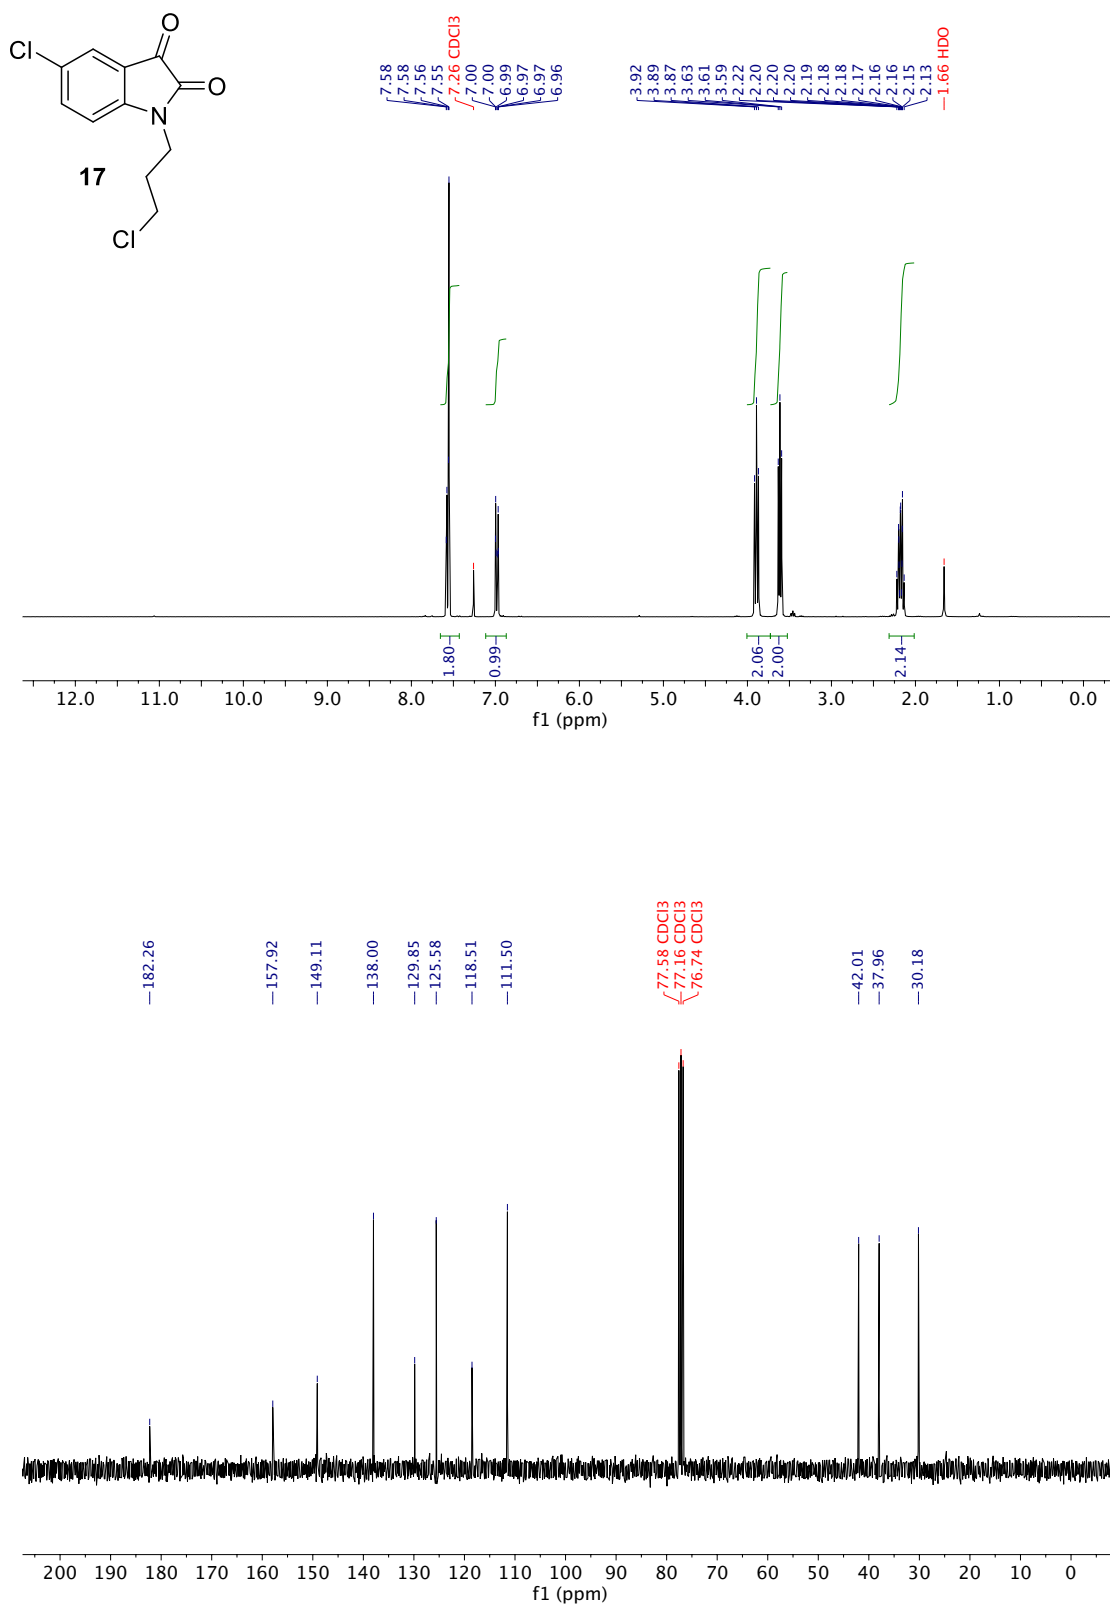

**Figure S9.**  $^1\text{H}$ - and  $^{13}\text{C}$ -NMR (300 and 75 MHz,  $\text{CDCl}_3$ ) spectra of compound **18**:

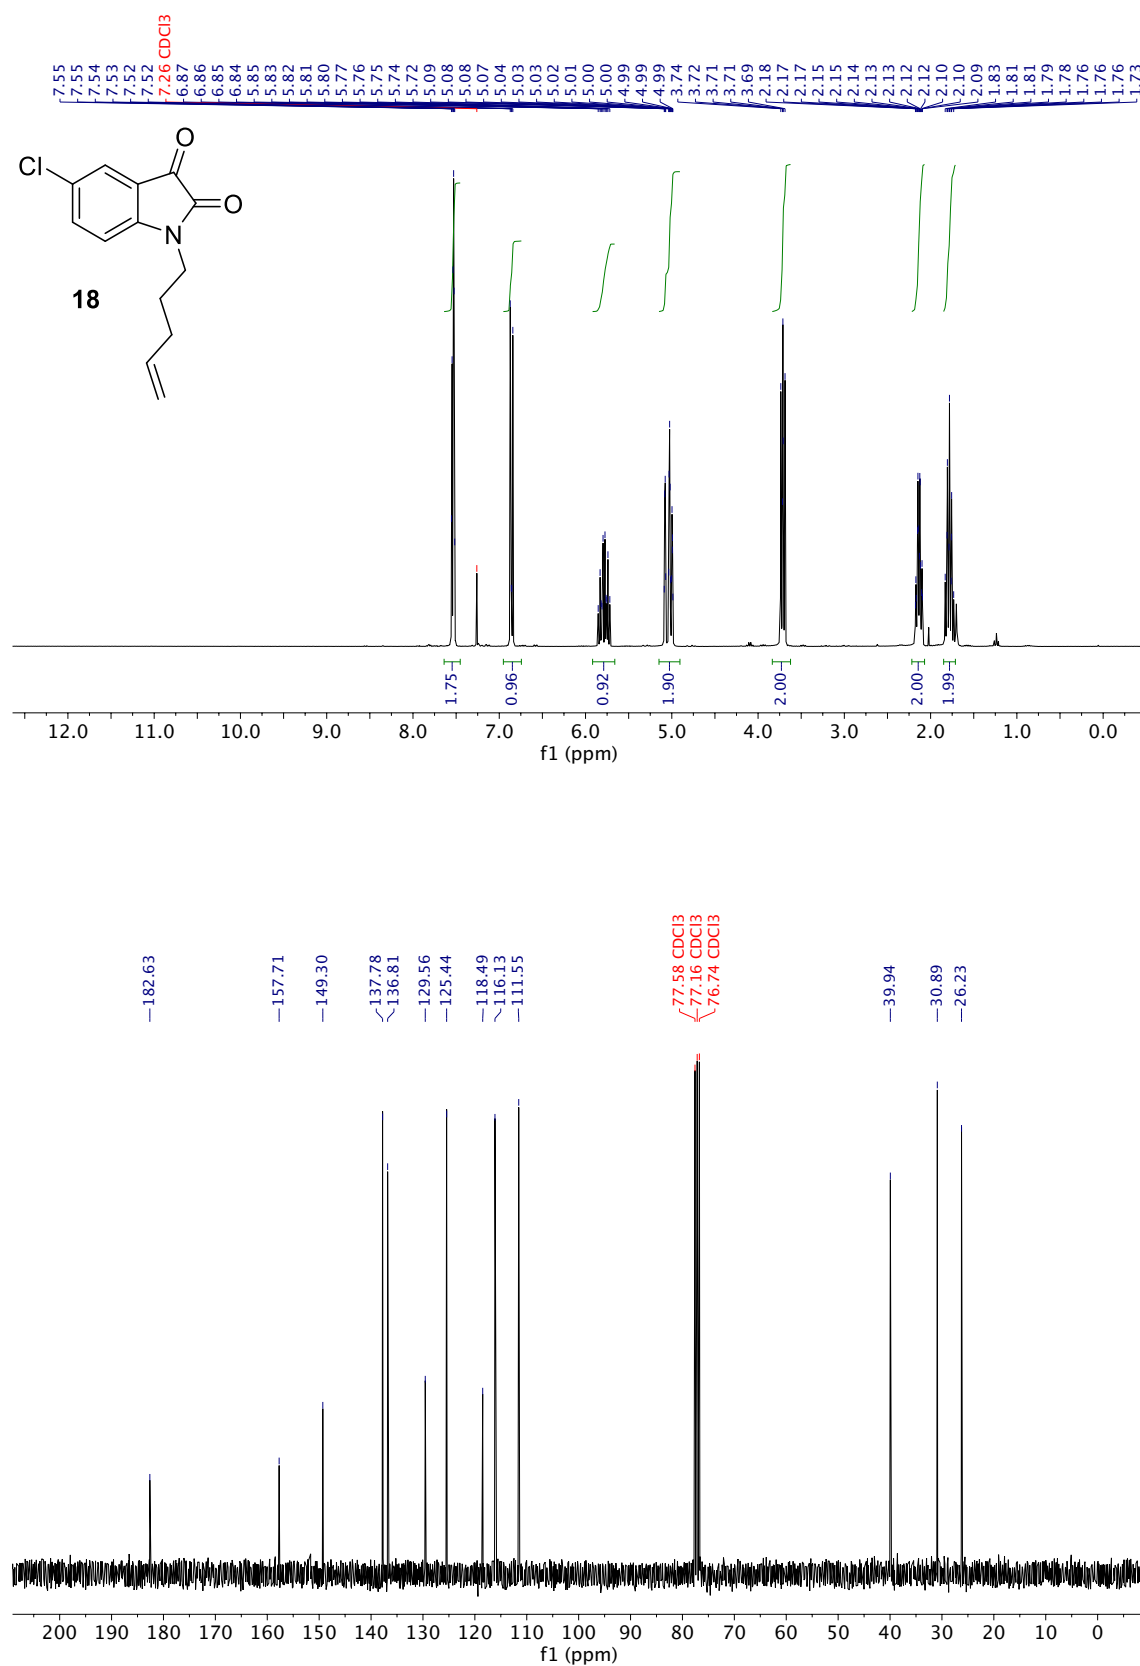

**Figure S10.**  $^1\text{H}$ -NMR (300 MHz,  $\text{CDCl}_3$ ) spectrum of **19**:

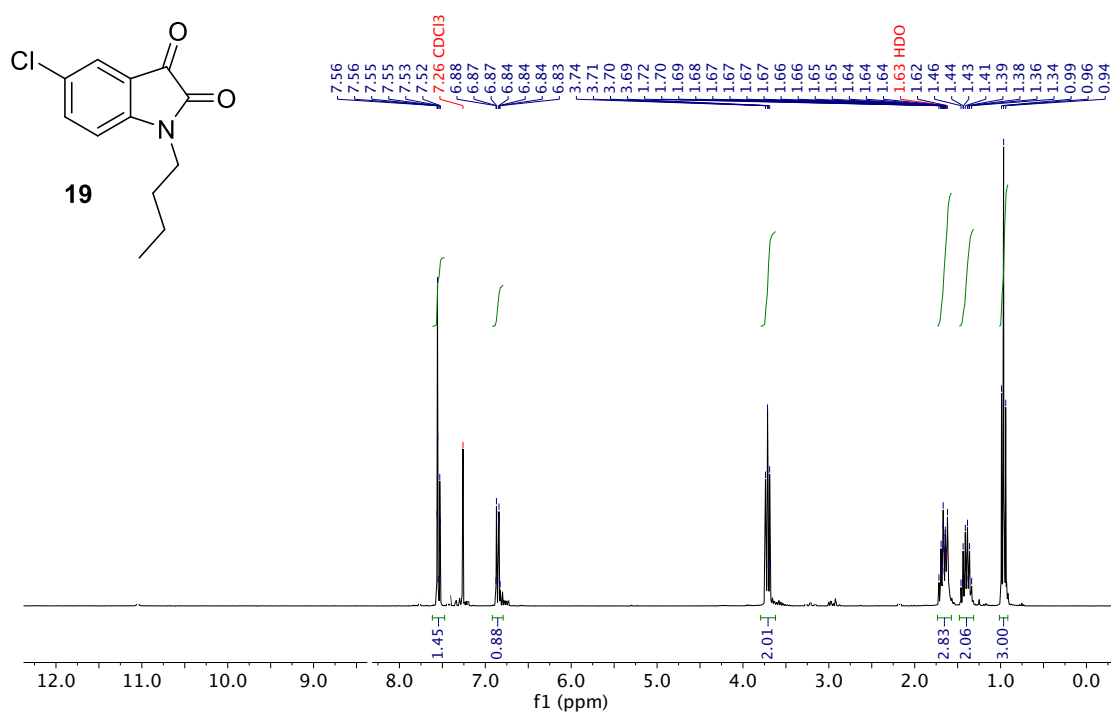

**Figure S11.**  $^1\text{H}$ - and  $^{13}\text{C}$ -NMR (300 and 75 MHz,  $\text{DMSO-}d_6$ ) spectra of **20**:

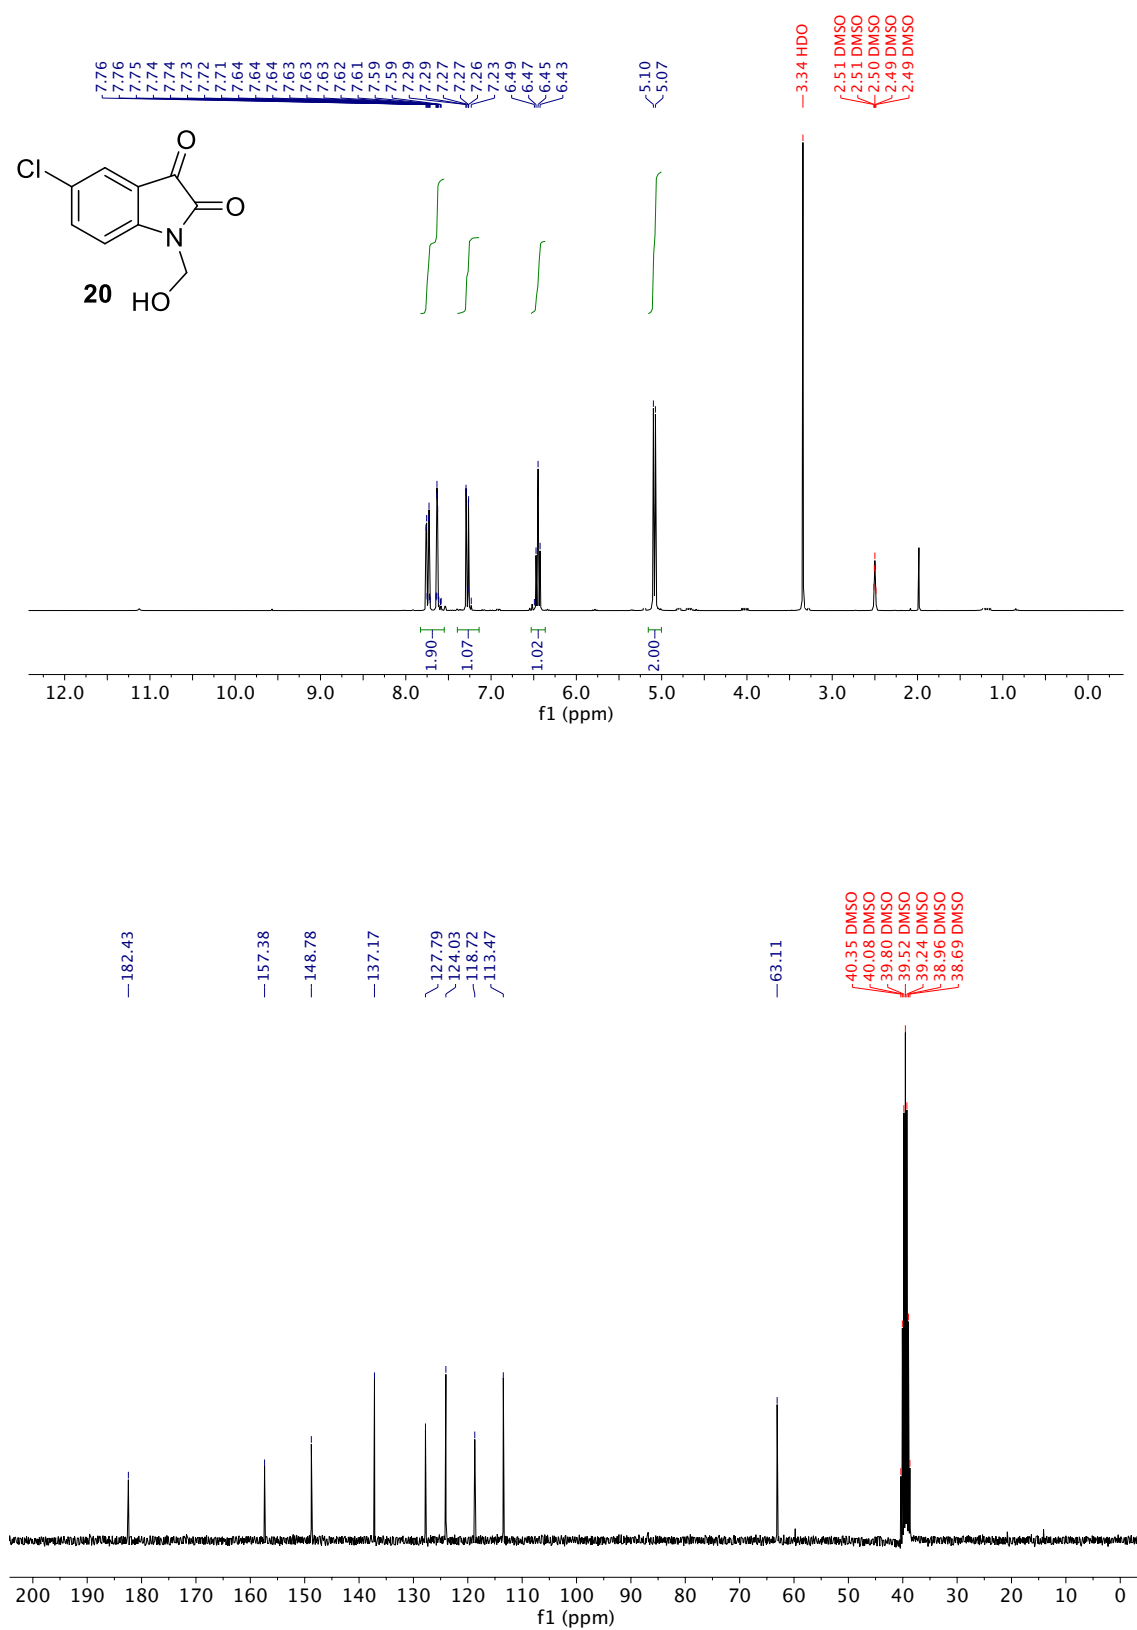

**Figure S12.**  $^1\text{H}$ - and  $^{13}\text{C}$ -NMR (300 and 75 MHz,  $\text{DMSO}-d_6$ ) spectra of **21**:

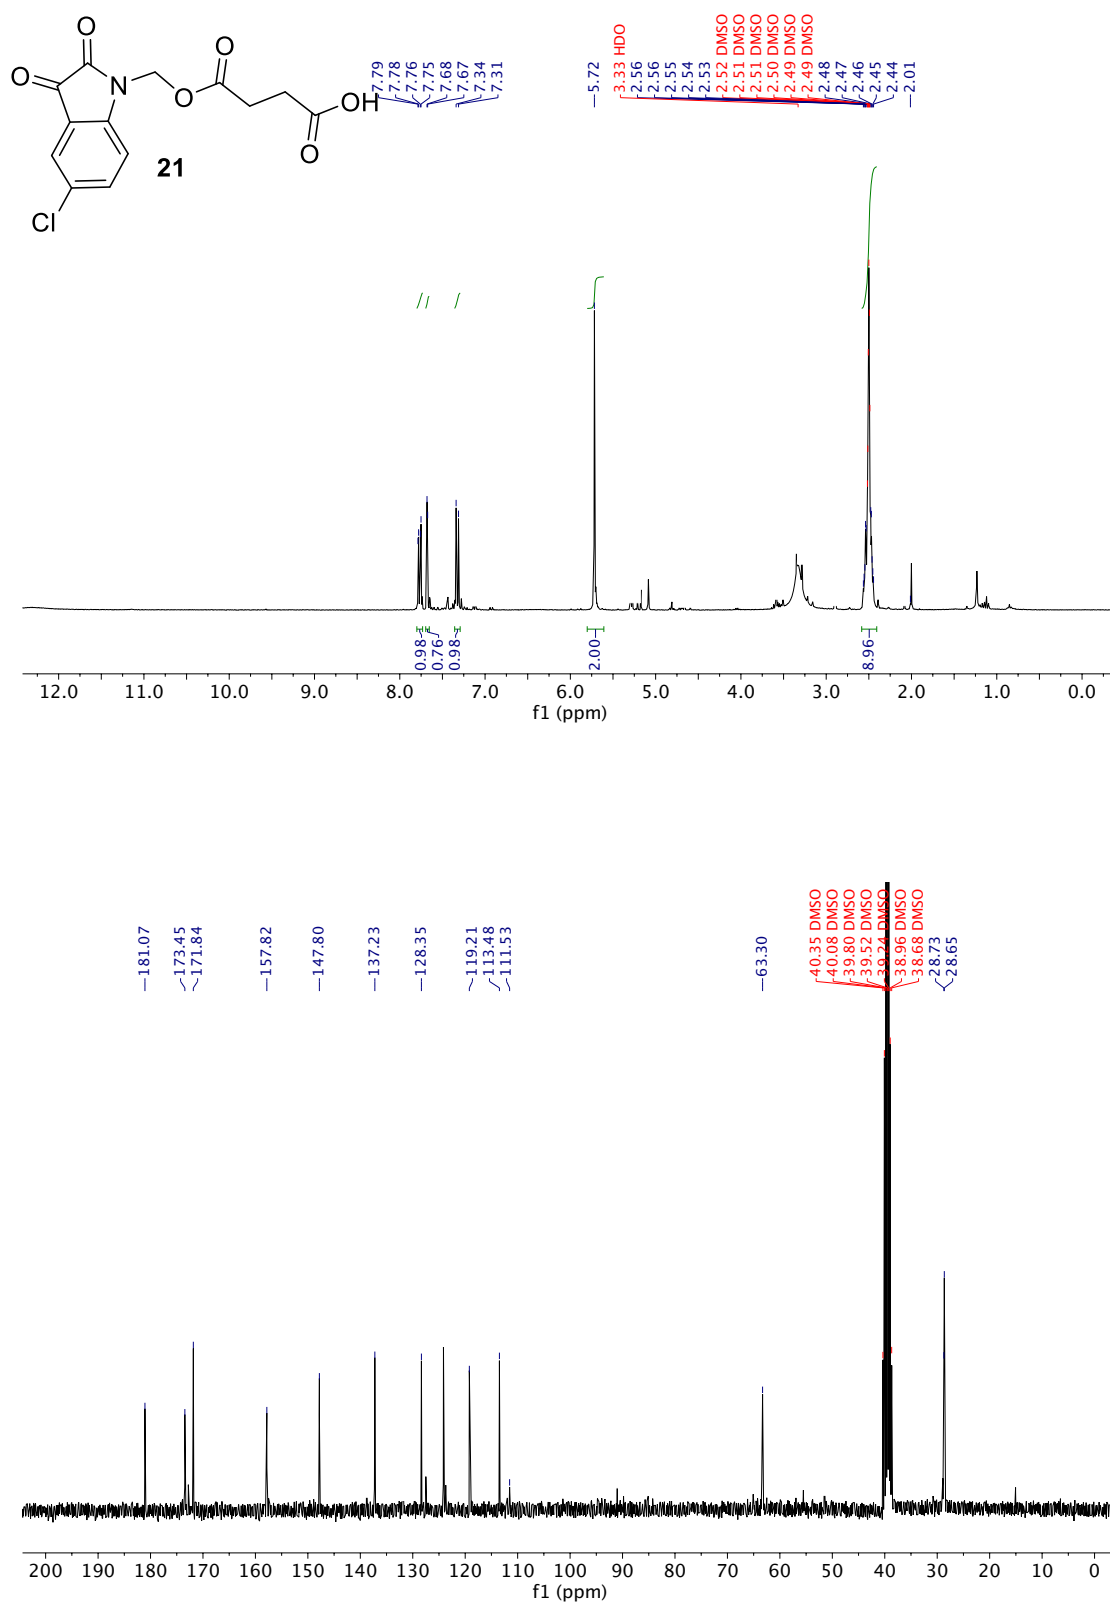



**Figure S13.**  $^1\text{H}$ - and  $^{13}\text{C}$ -NMR (300 and 75 MHz,  $\text{DMSO}-d_6$ ) spectra of **22**:

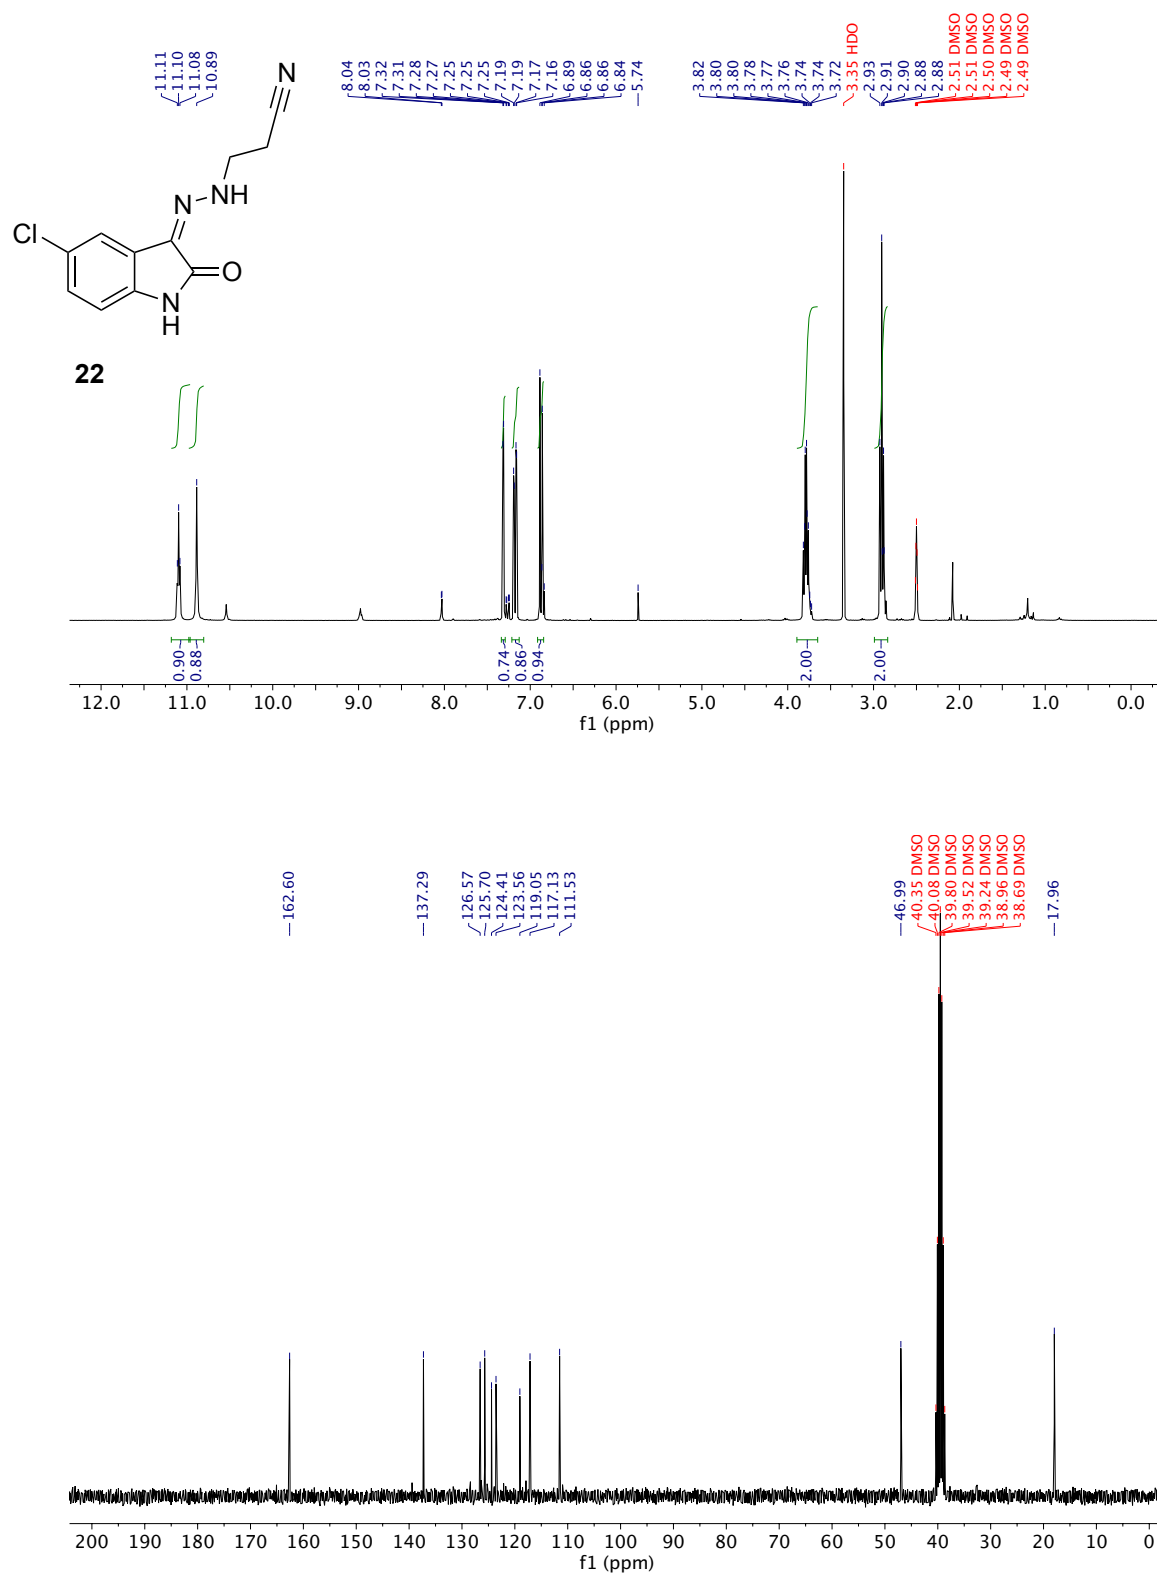

**Figure S14.**  $^1\text{H}$ -NMR (300 MHz,  $\text{DMSO}-d_6$ ) spectrum of **23**:

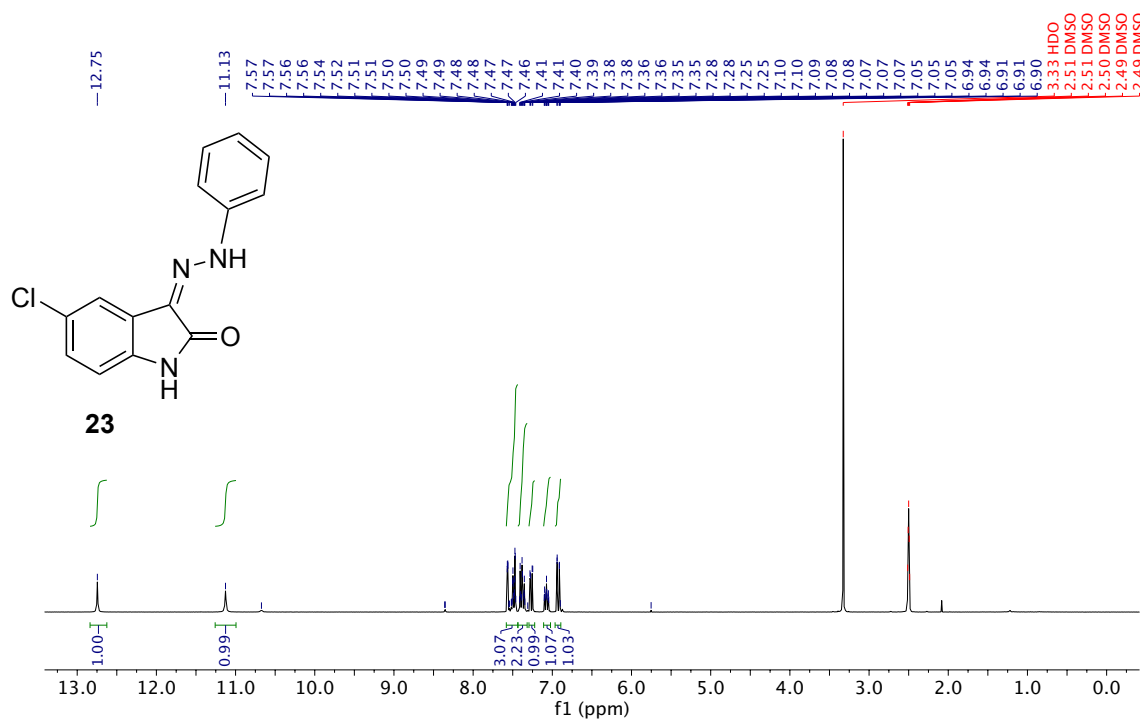

Supplement: s1 [file s1]
